# Supplementary material for: Interplay of halogen and hydrogen bonding in a series of heteroleptic iron( iii ) complexes
Source: Royal Society of Chemistry journal article supplement (doi:10.1039/d1ce00480h), 2021-01-01
Supplement: d1ce00480h1.pdf [file d1ce00480h1.pdf]

## Interplay of halogen and hydrogen bonding in a series of heteroleptic iron(III) complexes

**Authors:** Raúl Díaz-Torres,<sup>1</sup> Jorge Echeverría,<sup>2</sup> Oliver Loveday,<sup>2</sup>  
Phimphaka Harding\*<sup>1</sup> and David J. Harding\*<sup>1</sup>

<sup>1</sup> Functional Materials and Nanotechnology Centre of Excellence, Walailak University,  
Thasala, Nakhon Si Thammarat, 80160, Thailand.

<sup>2</sup> Departament de Química Inorgànica i Orgànica & IQTC-UB, Universitat de Barcelona,  
Martí i Franquès, 1-11, 08028 Barcelona, Spain.

E-mail: [hdavid@mail.wu.ac.th](mailto:h david@mail.wu.ac.th) or [kphimpha@mail.wu.ac.th](mailto:kphimpha@mail.wu.ac.th)

[www.funtechwu.com](http://www.funtechwu.com)

Twitter: @GroupHarding

## Table of Contents

|                                                                                                                                                                           | Page No. |
|---------------------------------------------------------------------------------------------------------------------------------------------------------------------------|----------|
| <b>Figure S1</b> UV-Visible spectra of <b>4</b> in DCM and DMF at 0.001 M.                                                                                                | 3        |
| <b>Figure S2</b> ATR-IR spectra for <b>1-4</b> .                                                                                                                          | 3        |
| <b>Table S1</b> Crystallographic data and structure refinement of <b>1-4</b> .                                                                                            | 6        |
| <b>Table S2</b> Intermolecular interactions of <b>1-4</b> (Å).                                                                                                            | 7        |
| <b>Figure S3</b> Experimental PXRD diffractograms and the corresponding simulated patterns for <b>1-4</b> at room temperature.                                            | 8        |
| <b>Figure S4</b> Cross-section of the 1D chain for <b>1</b> (square) and <b>4</b> (rectangular).                                                                          | 10       |
| <b>Figure S5</b> Structural representation of the supramolecular $\pi$ - $\pi$ and C-H $\cdots$ O contacts connecting the planes of Fe(III) centers in <b>1</b> .         | 10       |
| <b>Figure S6</b> Structural representation of the supramolecular O $\cdots$ I interactions connecting the planes of Fe(III) centers in <b>4</b> .                         | 11       |
| <b>Figure S7</b> Hirshfeld surface 2D fingerprint plots: all contacts, H $\cdots$ X, O $\cdots$ X, H $\cdots$ H and O $\cdots$ H for <b>1-4</b> .                         | 12       |
| <b>Table S3</b> Intermolecular interactions contributions for <b>1-4</b> calculated by Hirshfeld surface.                                                                 | 12       |
| <b>Table S4</b> QTAIM parameters at the bond critical points for the different dimers in the crystal structures <b>1-4</b> . All values are given in a.u.                 | 13       |
| <b>Figure S8</b> Cyclic voltammogram (Fe <sup>3+</sup> /Fe <sup>2+</sup> redox peak) of <b>1-4</b> at different scan rates and the representation of $i_p$ vs $v^{1/2}$ . | 14       |
| <b>Table S5</b> Electrochemical properties of <b>1-4</b> .                                                                                                                | 15       |
| <b>Figure S9</b> Cyclic voltammogram of <b>4</b> in DCM containing 0.1 M of TBAPF <sub>6</sub> (scan rate 50 mV/s) vs Fc/Fc <sup>+</sup> .                                | 16       |
| <b>Figure S10</b> Cyclic voltammogram of Hqsal-I in DCM containing 0.1 M of TBAPF <sub>6</sub> (scan rate 50 mV/s) vs Fc/Fc <sup>+</sup> .                                | 16       |
| <b>Figure S11</b> Plot of $E'^{\circ}$ (V) vs $\sigma_p$ for <b>1-4</b> .                                                                                                 | 17       |

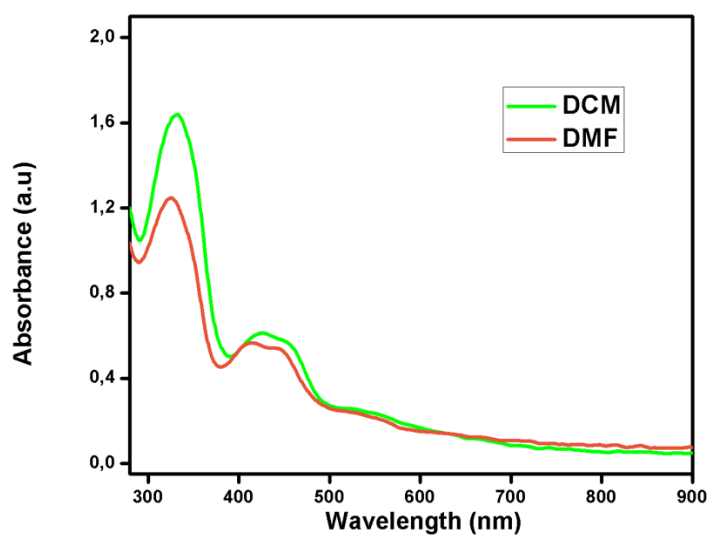

**Figure S1** UV-Visible spectra of **4** in DCM (green) and DMF (orange) at 0.001 M.

#### ATR-IR spectra

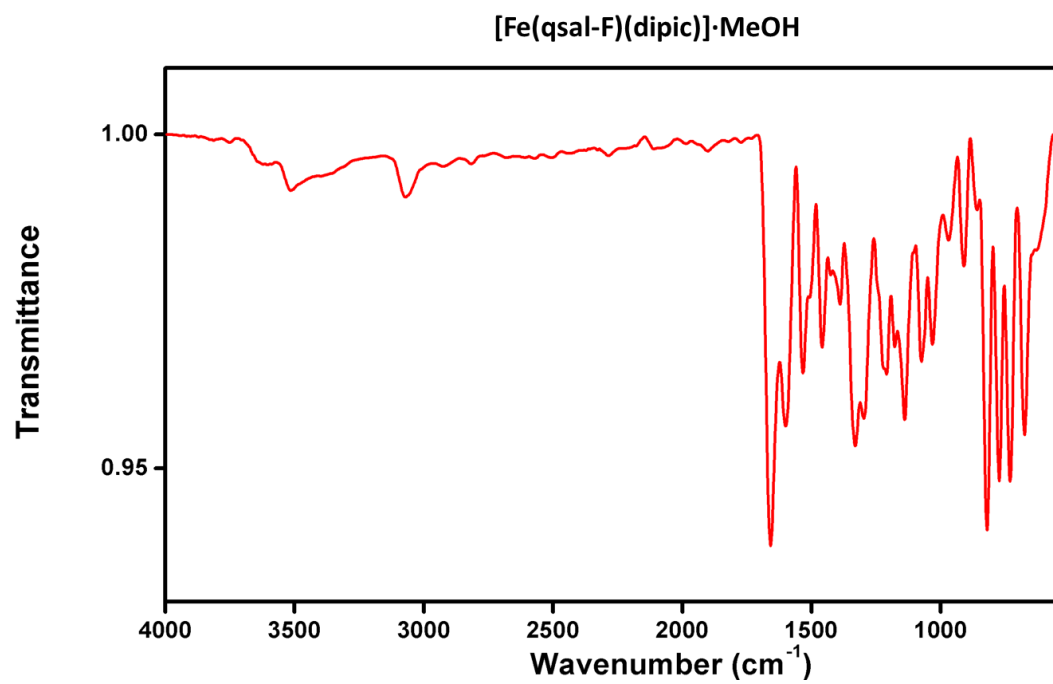

[Fe(qsal-Cl)(dipic)]·MeOH

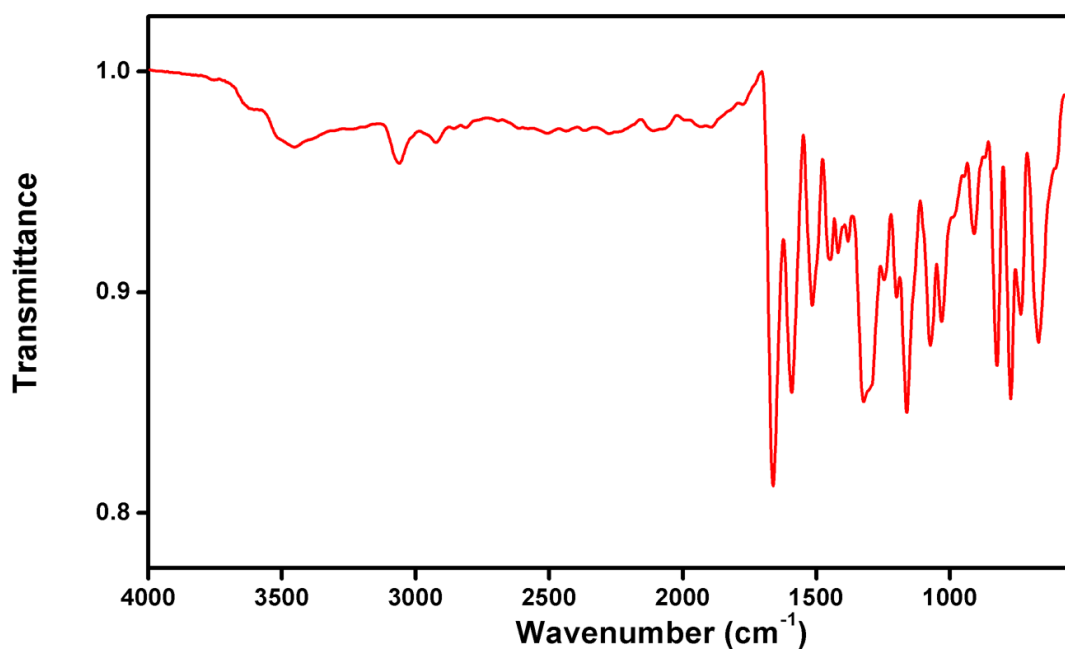

[Fe(qsal-Br)(dipic)]·MeOH

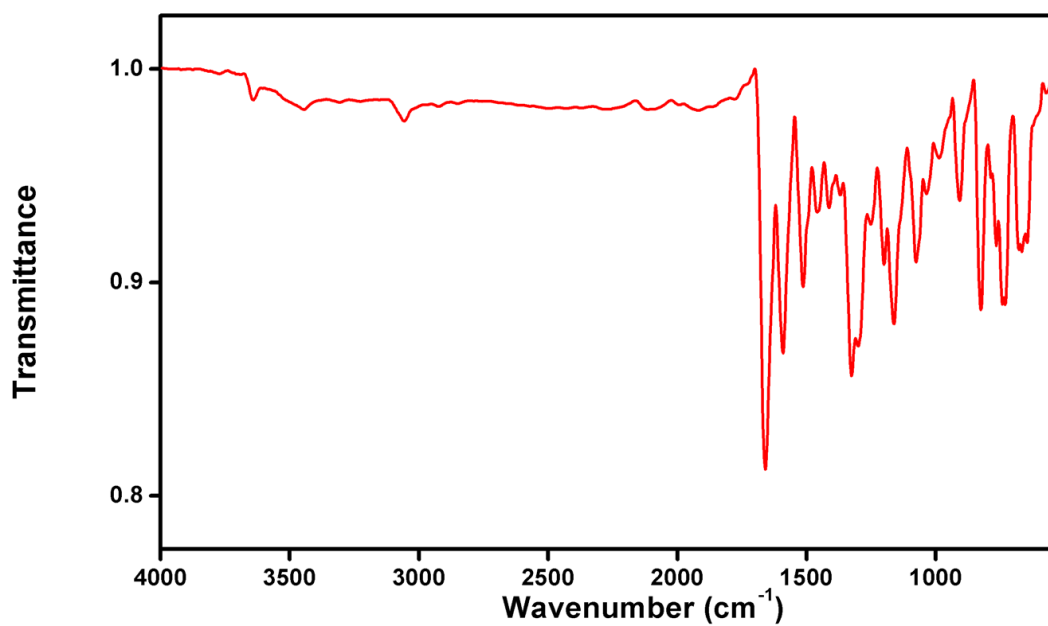

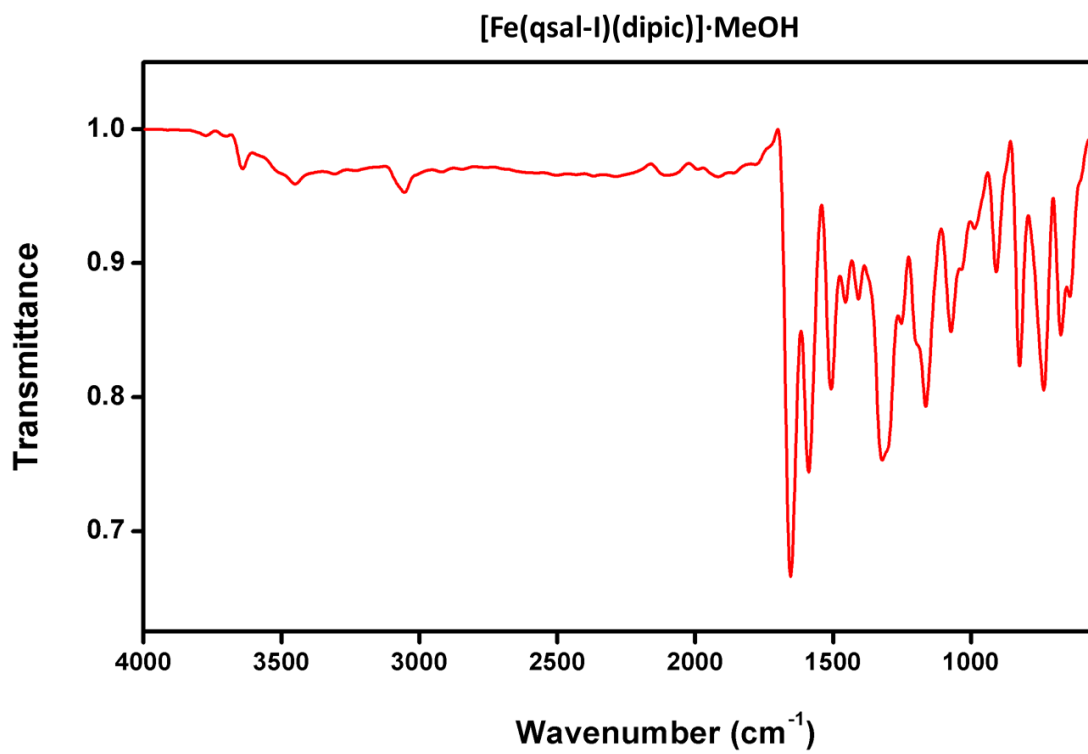

**Figure S2** ATR-IR spectra for **1-4**.

**Table S1** Crystallographic data and structure refinement of **1-4**.

| <b>[Fe(qsal-X)(dipic)]·MeOH</b>           |                                                                  |                                                                   |                                                                   |                                                                  |
|-------------------------------------------|------------------------------------------------------------------|-------------------------------------------------------------------|-------------------------------------------------------------------|------------------------------------------------------------------|
|                                           | <b>F</b>                                                         | <b>Cl</b>                                                         | <b>Br</b>                                                         | <b>I</b>                                                         |
| Empirical formula                         | C <sub>24</sub> H <sub>17</sub> FFeN <sub>3</sub> O <sub>6</sub> | C <sub>24</sub> H <sub>17</sub> ClFeN <sub>3</sub> O <sub>6</sub> | C <sub>24</sub> H <sub>17</sub> BrFeN <sub>3</sub> O <sub>6</sub> | C <sub>24</sub> H <sub>17</sub> IFeN <sub>3</sub> O <sub>6</sub> |
| Formula weight/ gmol <sup>-1</sup>        | 518.26                                                           | 534.70                                                            | 579.16                                                            | 626.15                                                           |
| Crystal system                            | triclinic                                                        | triclinic                                                         | monoclinic                                                        | monoclinic                                                       |
| Space group                               | <i>P</i> $\bar{1}$                                               | <i>P</i> $\bar{1}$                                                | <i>P</i> 2 <sub>1</sub> / <i>n</i>                                | <i>P</i> 2 <sub>1</sub> / <i>n</i>                               |
| a / Å                                     | 8.1982(3)                                                        | 8.2215(2)                                                         | 12.20560(10)                                                      | 12.1991(2)                                                       |
| b / Å                                     | 11.5358(5)                                                       | 11.9651(3)                                                        | 9.30670(10)                                                       | 9.3756(2)                                                        |
| c / Å                                     | 12.9597(6)                                                       | 12.8982(3)                                                        | 18.8067(2)                                                        | 19.0747(4)                                                       |
| α / °                                     | 103.868(4)                                                       | 105.940(2)                                                        | 90                                                                | 90                                                               |
| β / °                                     | 103.308(4)                                                       | 105.557(2)                                                        | 94.8010(10)                                                       | 95.6028(19)                                                      |
| γ / °                                     | 107.779(4)                                                       | 104.264(2)                                                        | 90                                                                | 90                                                               |
| Cell volume / Å <sup>3</sup>              | 1070.33(9)                                                       | 1102.95(5)                                                        | 2128.83(4)                                                        | 2171.23(8)                                                       |
| Z                                         | 2                                                                | 2                                                                 | 4                                                                 | 4                                                                |
| Absorption coefficient / mm <sup>-1</sup> | 6.168                                                            | 7.027                                                             | 8.326                                                             | 17.172                                                           |
| Reflections collected                     | 15309                                                            | 16928                                                             | 17206                                                             | 17238                                                            |
| Independent reflections, R <sub>int</sub> | 3880, 0.0798                                                     | 4030, 0.0546                                                      | 3905, 0.0782                                                      | 3969                                                             |
| Max. and min. transmission                | 0.736 / 0.202                                                    | 0.743 / 0.397                                                     | 1.000 / 0.734                                                     | 0.526 / 0.232                                                    |
| Restraints/parameters                     | 0/ 318                                                           | 36/ 318                                                           | 0/ 318                                                            | 0/ 318                                                           |
| Final R indices [I>=2σ (I)]               |                                                                  |                                                                   |                                                                   |                                                                  |
| R <sub>1</sub> , wR <sub>2</sub>          | 0.0686, 0.1762                                                   | 0.0813, 0.2119                                                    | 0.0489, 0.1237                                                    | 0.0675, 0.1704                                                   |
| CCDC No.                                  | 2075294                                                          | 2075296                                                           | 2075295                                                           | 2075297                                                          |

**Table S2** Intermolecular interactions of **1-4** (Å).

|                                          |                   | <b>F</b> | <b>Cl</b> | <b>Br</b> | <b>I</b> |
|------------------------------------------|-------------------|----------|-----------|-----------|----------|
| <b>1D chain</b>                          |                   |          |           |           |          |
| <b>C-H...O</b>                           |                   |          |           |           |          |
|                                          | O1-H21            | 2.587    | 2.582     | 2.686     | 2.711    |
|                                          | O2-H10            | 2.472    | 2.541     | 2.643     | 2.497    |
| <b><math>\pi</math>-<math>\pi</math></b> |                   |          |           |           |          |
| Quinoline                                | centroid-centroid | 3.794    | 3.696     | 3.668     | 3.710    |
| Dipic                                    | centroid-centroid | -        | -         | 3.553     | 3.567    |
| <b>C=O...<math>\pi</math></b>            |                   |          |           |           |          |
| dipic                                    | atom-atom         | 3.322    | 3.350     | -         | -        |
| <b>Fe-Fe</b>                             |                   |          |           |           |          |
| dipic                                    |                   | 7.529    | 7.466     | 7.691     | 7.707    |
| quinoline                                |                   | 6.756    | 6.769     | 7.061     | 7.087    |
| <b>2D and 3D</b>                         |                   |          |           |           |          |
| <b><math>\pi</math>-<math>\pi</math></b> |                   |          |           |           |          |
| Quinoline                                | centroid-centroid | 3.771    | 3.525     | 3.575     | 3.585    |
| <b>C-H...O</b>                           |                   |          |           |           |          |
| dipic-quin                               | O5-H5             | 2.662    | 2.576     | 2.662     | 2.675    |
| X...H                                    | X1-H1             | 2.437    | 2.844     | 3.008     | 3.058    |
| X... $\pi$                               | X1-C21            | -        | 3.422     | -         | 3.632    |
| X...O                                    | X1-O5             | -        | -         | 3.166     | 3.151    |
| OH...CH                                  | H6A-O5            | 1.930    | 1.831     | 2.236     | 2.261    |

1

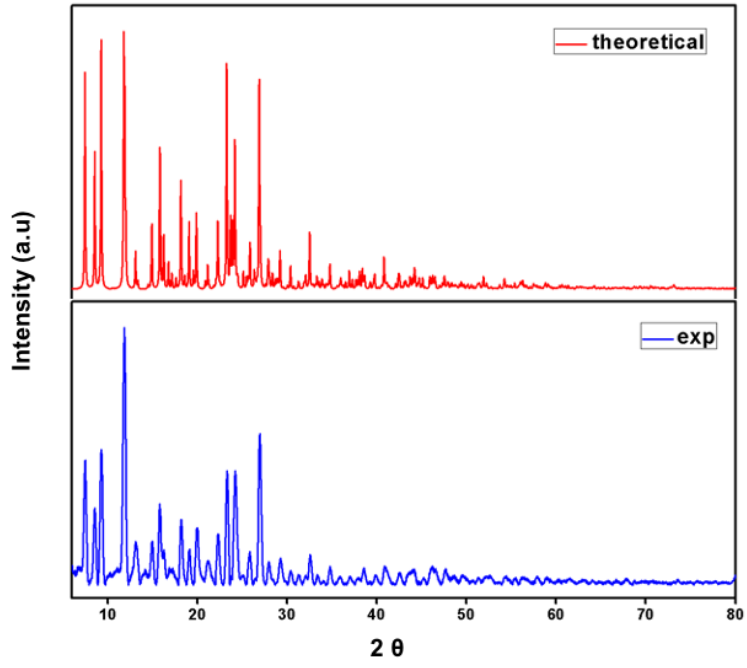

2

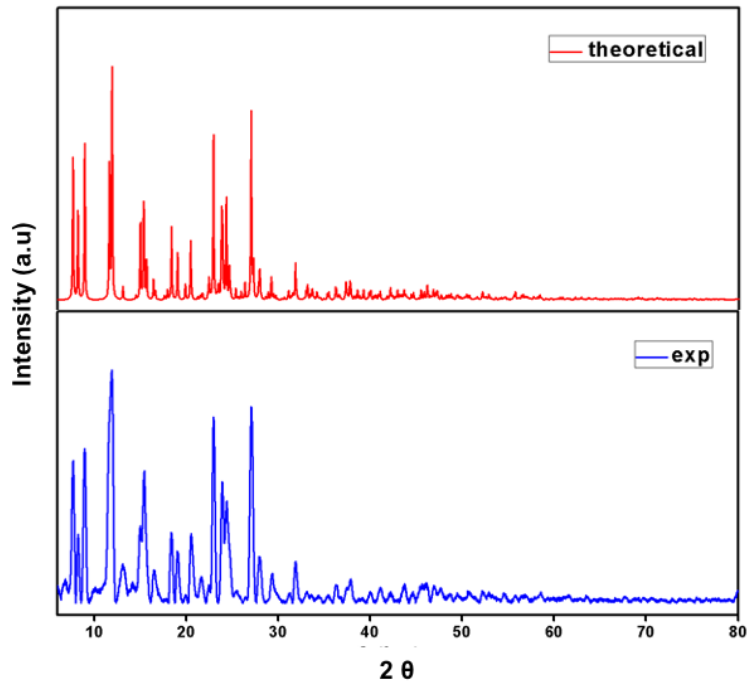



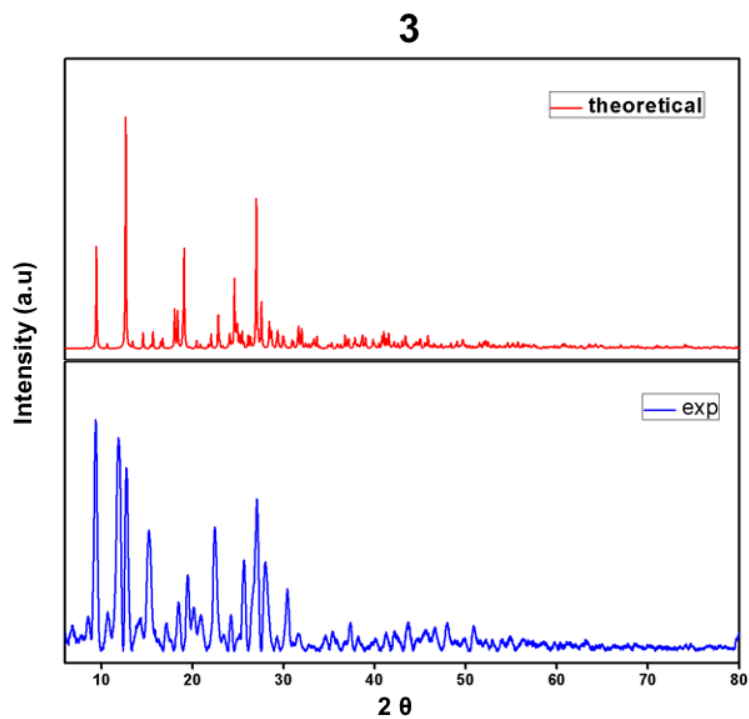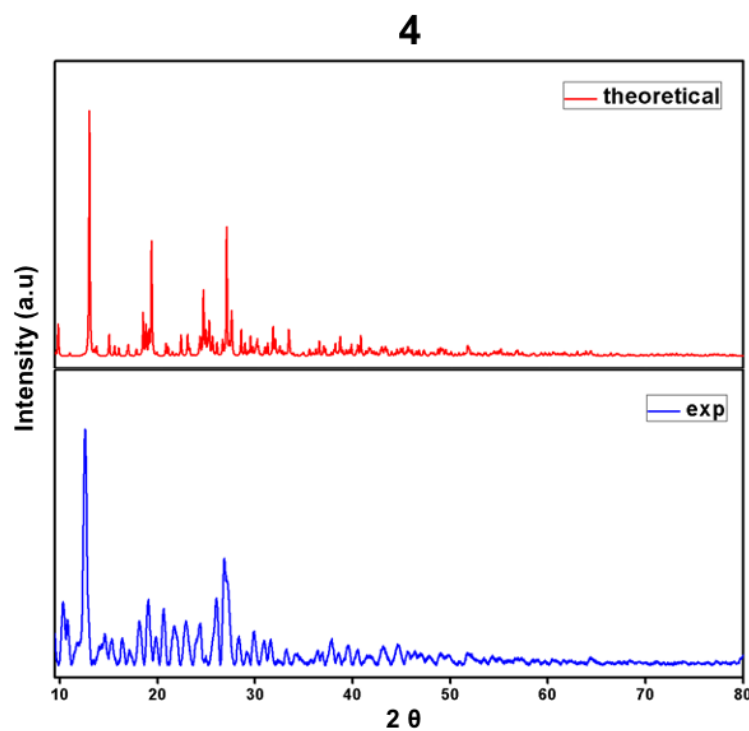

**Figure S3** Experimental PXRD diffractograms (blue) and the corresponding simulated patterns (red) for **1-4** at room temperature.

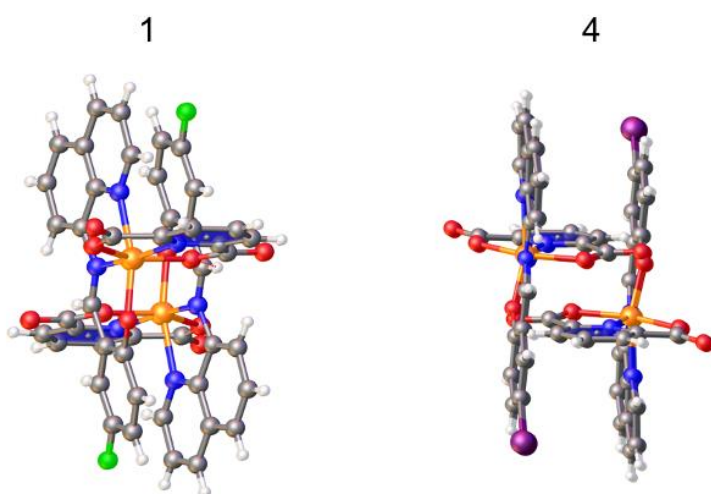

**Figure S4** Cross-section of the 1D chain for **1** (square) and **4** (rectangular).

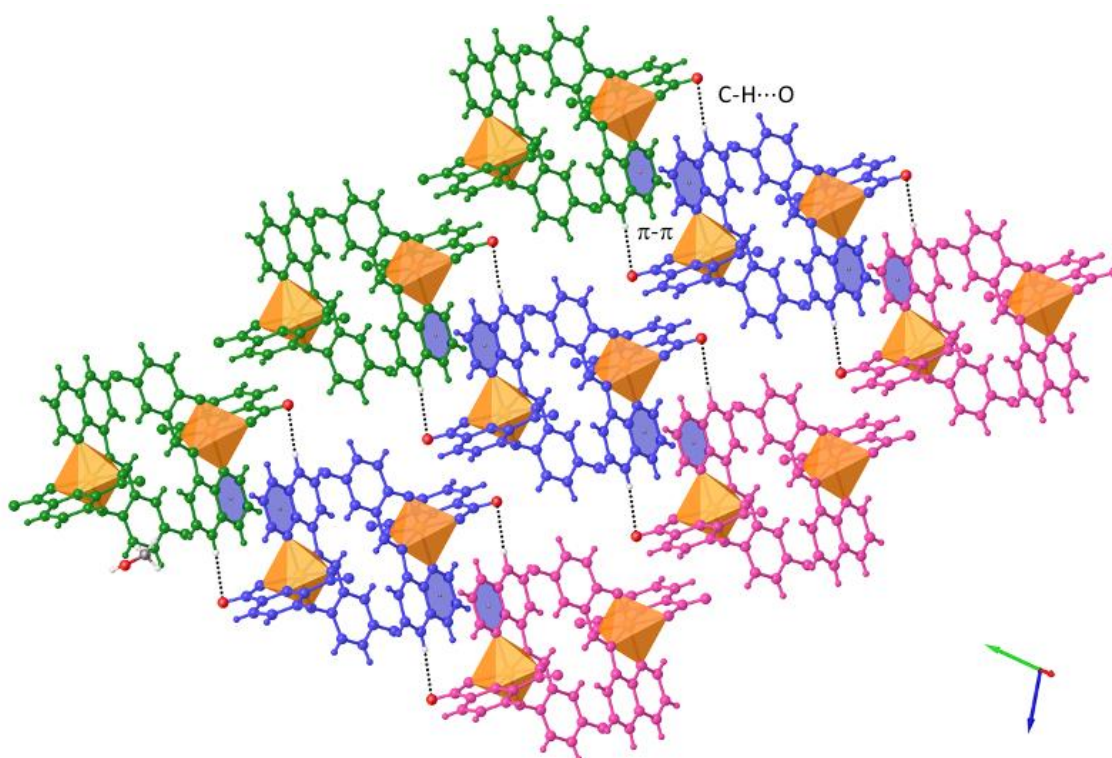

**Figure S5** Structural representation of the supramolecular  $\pi$ - $\pi$  and C-H...O contacts connecting the planes of Fe(III) centers in **1**.

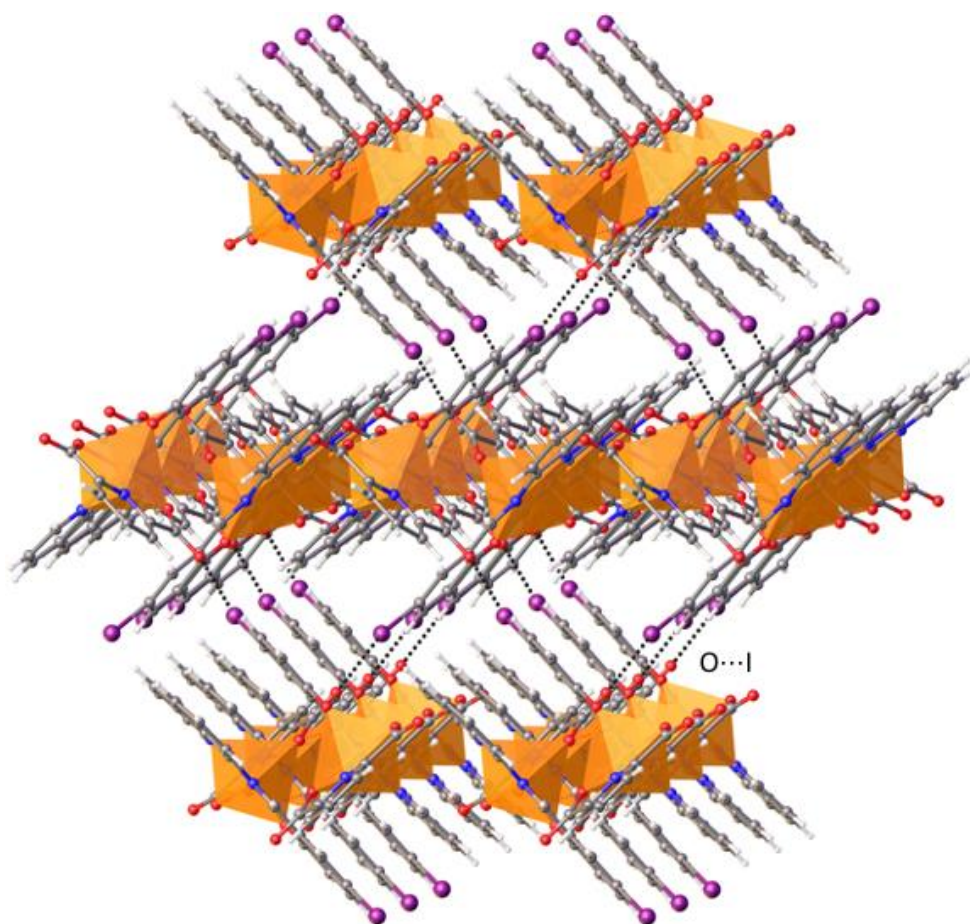

**Figure S6** Structural representation of the supramolecular O...I interactions connecting the planes of Fe(III) centers in **4**.

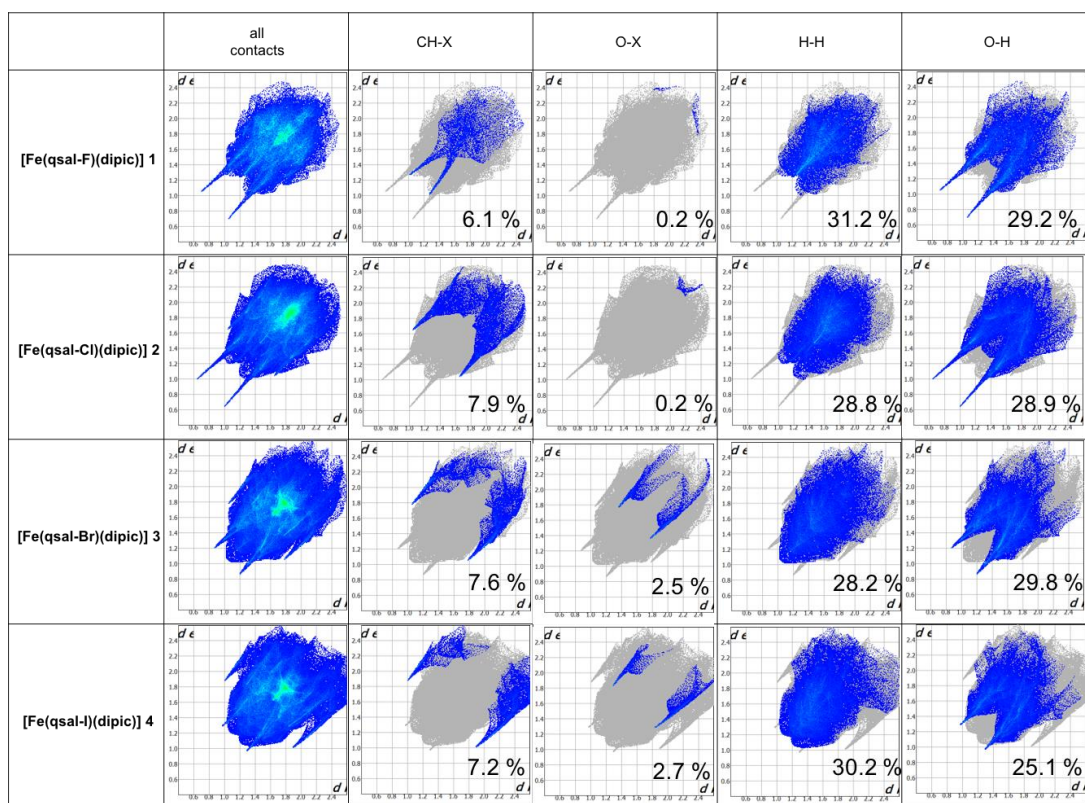

**Figure S7** Hirshfeld surface 2D fingerprint plots: all contacts, C-H...X, O...X, H...H and O...H for **1-4**.

**Table S3** Intermolecular interactions contributions for **1-4** calculated by Hirshfeld surface.

|          | H...H | CH...X | H...O | H...C | O...X | C...C | C...X | H...N | Other |
|----------|-------|--------|-------|-------|-------|-------|-------|-------|-------|
| <b>1</b> | 31.2  | 6.1    | 29.2  | 14.7  | 0.2   | 9.0   | 3.2   | 1.6   | 4.8   |
| <b>2</b> | 28.8  | 7.9    | 28.9  | 15.2  | 0.2   | 8.2   | 4.1   | 1.7   | 5.0   |
| <b>3</b> | 28.2  | 7.6    | 29.8  | 12.0  | 2.5   | 9.0   | 3.2   | 1.9   | 5.6   |
| <b>4</b> | 30.2  | 7.2    | 25.1  | 16.0  | 2.7   | 8.3   | 3.0   | 1.9   | 5.8   |

## Theoretical Results

**Table S4.** QTAIM parameters at the bond critical points for the different dimers in the crystal structures **1-4**. All values are given in a.u.

| System                             | X  | $\rho$ | $\nabla^2\rho$ | V       | G      | H      | $ V /G$ | D(A,B) |
|------------------------------------|----|--------|----------------|---------|--------|--------|---------|--------|
| <b>1 hydrogen bond</b>             | F  | 0.0069 | 0.0317         | -0.0042 | 0.0061 | 0.0019 | 0.6885  | 0.0266 |
| <b>1 X<math>\cdots\pi</math></b>   |    | 0.0044 | 0.0166         | -0.0022 | 0.0032 | 0.0010 | 0.6875  | 0.0198 |
| <b>1 C=O<math>\cdots\pi</math></b> |    | 0.0050 | 0.0168         | -0.0024 | 0.0033 | 0.0009 | 0.7273  | 0.0081 |
| <b>2 hydrogen bond</b>             | Cl | 0.0059 | 0.0215         | -0.0030 | 0.0042 | 0.0012 | 0.7143  | 0.0302 |
| <b>2 X<math>\cdots\pi</math></b>   |    | 0.0064 | 0.0198         | -0.0029 | 0.0039 | 0.0010 | 0.7436  | 0.0400 |
| <b>2 C=O<math>\cdots\pi</math></b> |    | 0.0055 | 0.0186         | -0.0027 | 0.0037 | 0.0010 | 0.7297  | 0.0158 |
| <b>3 halogen bond</b>              | Br | 0.0083 | 0.0331         | -0.0049 | 0.0066 | 0.0017 | 0.7424  | 0.0773 |
| <b>3 X<math>\cdots</math>H</b>     |    | 0.0058 | 0.0178         | -0.0027 | 0.0036 | 0.0009 | 0.7500  | 0.0371 |
| <b>3 <math>\pi\cdots\pi</math></b> |    | 0.0067 | 0.0212         | -0.0033 | 0.0043 | 0.0010 | 0.7674  | 0.0147 |
| <b>4 halogen bond</b>              | I  | 0.0109 | 0.0405         | -0.0065 | 0.0083 | 0.0018 | 0.7831  | 0.1077 |
| <b>4 X<math>\cdots</math>H</b>     |    | 0.0071 | 0.0193         | -0.0032 | 0.0040 | 0.0008 | 0.8000  | 0.0500 |
| <b>4 <math>\pi\cdots\pi</math></b> |    | 0.0067 | 0.0210         | -0.0033 | 0.0043 | 0.0010 | 0.7674  | 0.0147 |

# Electrochemical Studies

1

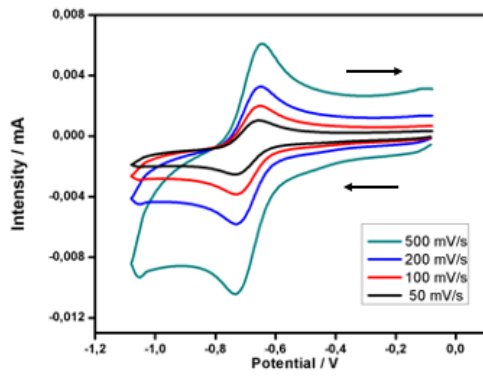

2

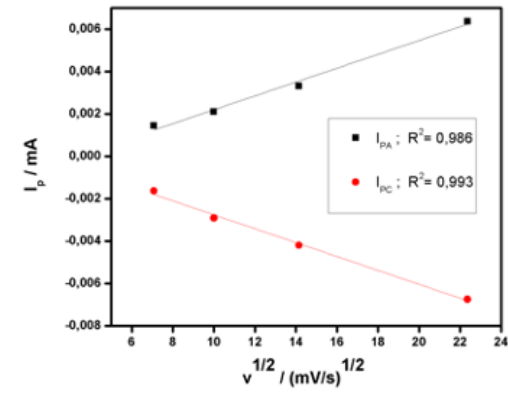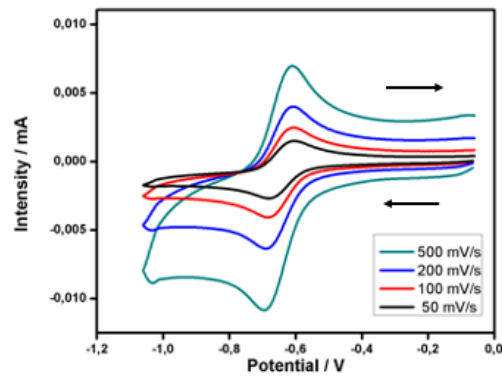

3

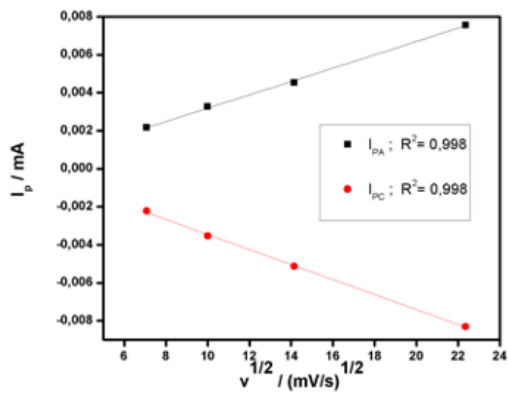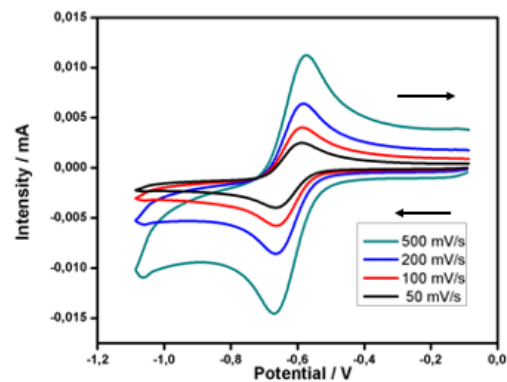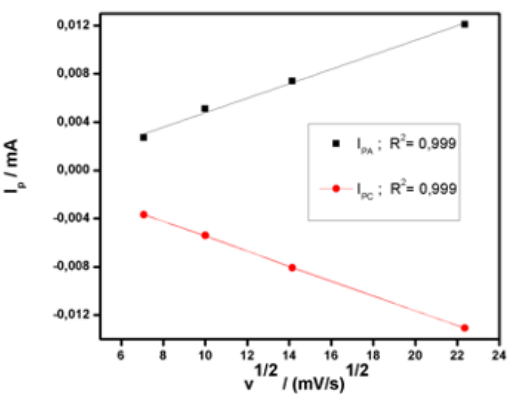

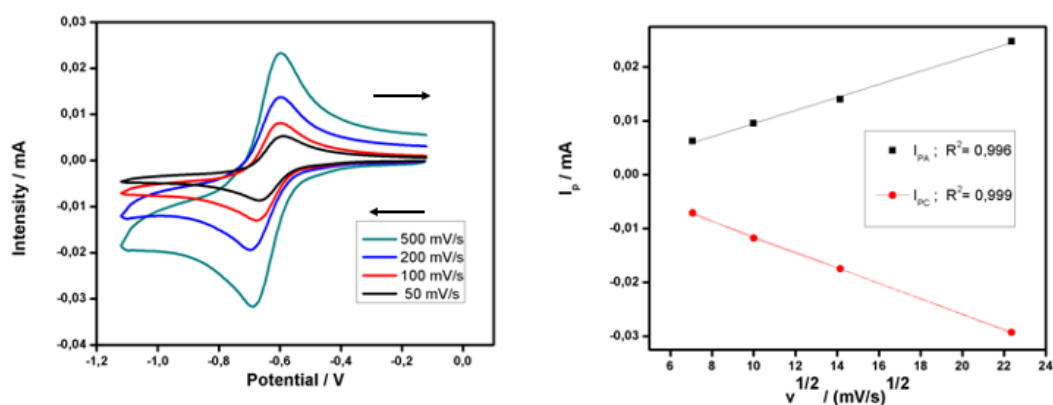

**Figure S8** Cyclic voltammogram ( $\text{Fe}^{3+}/\text{Fe}^{2+}$  redox peak) of **1-4** at different scan rates (left) and the representation of  $i_p$  vs  $v^{1/2}$  (right).

**Table S4** Electrochemical properties of **1-4**.

|          |          | $i_{pa}/i_{pc}$ | $\Delta E_p$ (V) | $E^{\circ'}$ (V) | $D(\text{cm}^2 \cdot \text{s}^{-1})$ |
|----------|----------|-----------------|------------------|------------------|--------------------------------------|
| <b>1</b> | 50 mV/s  | 0.856           | 0.063            | -0.681           | $5.31 \cdot 10^{-6}$                 |
|          | 100 mV/s | 0.881           | 0.065            | -0.675           |                                      |
|          | 200 mV/s | 0.905           | 0.070            | -0.683           |                                      |
|          | 500 mV/s | 0.959           | 0.072            | -0.682           |                                      |
| <b>2</b> | 50 mV/s  | 0.967           | 0.066            | -0.621           | $6.43 \cdot 10^{-6}$                 |
|          | 100 mV/s | 0.931           | 0.070            | -0.622           |                                      |
|          | 200 mV/s | 0.915           | 0.072            | -0.622           |                                      |
|          | 500 mV/s | 0.945           | 0.071            | -0.623           |                                      |
| <b>3</b> | 50 mV/s  | 0.869           | 0,066            | -0.620           | $1.68 \cdot 10^{-5}$                 |
|          | 100 mV/s | 0.892           | 0.068            | -0.615           |                                      |
|          | 200 mV/s | 0.959           | 0.072            | -0.618           |                                      |
|          | 500 mV/s | 0.959           | 0.088            | -0.619           |                                      |
| <b>4</b> | 50 mV/s  | 0.911           | 0.068            | -0.645           | $7.56 \cdot 10^{-5}$                 |
|          | 100 mV/s | 0.866           | 0.071            | -0.642           |                                      |
|          | 200 mV/s | 0.917           | 0.088            | -0.644           |                                      |
|          | 500 mV/s | 1.020           | 0.085            | -0.644           |                                      |

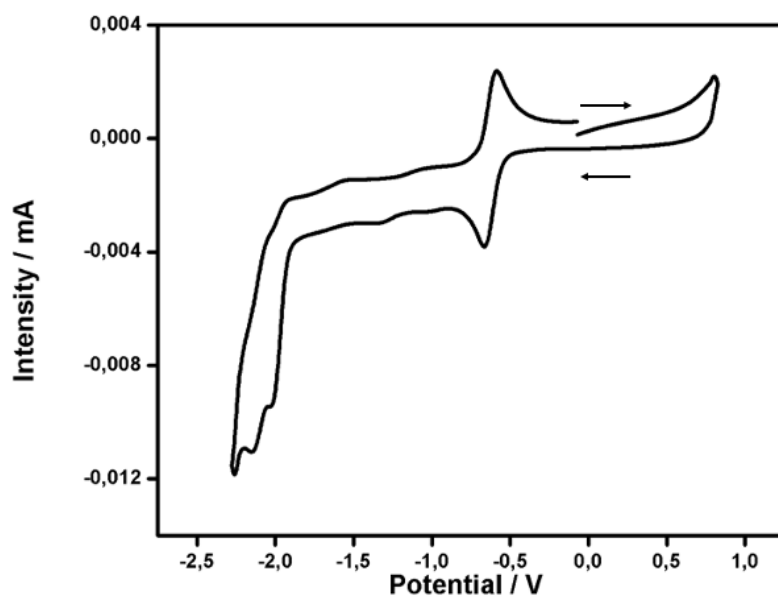

**Figure S9** Cyclic voltammogram of **4** in DCM containing 0.1 M of TBAPF<sub>6</sub> (scan rate 50 mV/s) vs Fc/Fc<sup>+</sup>.

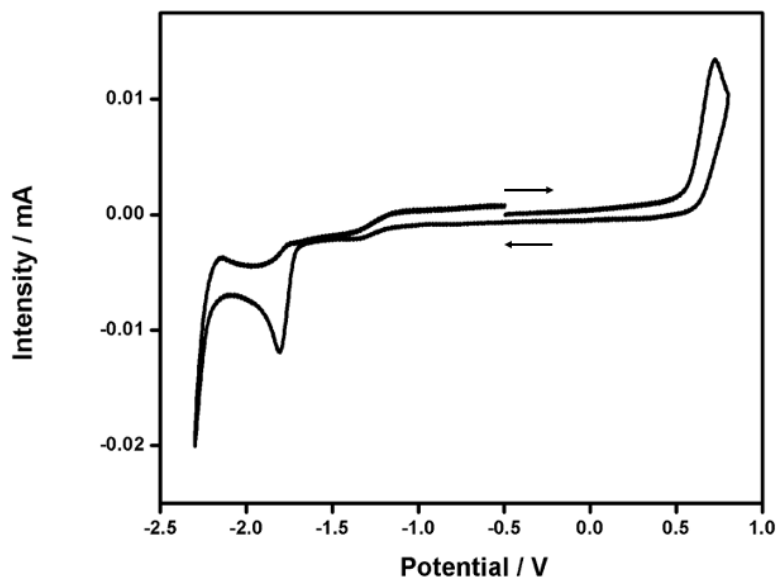

**Figure S10** Cyclic voltammogram of Hqsal-I in DCM containing 0.1 M of TBAPF<sub>6</sub> (scan rate 50 mV/s) vs Fc/Fc<sup>+</sup>.



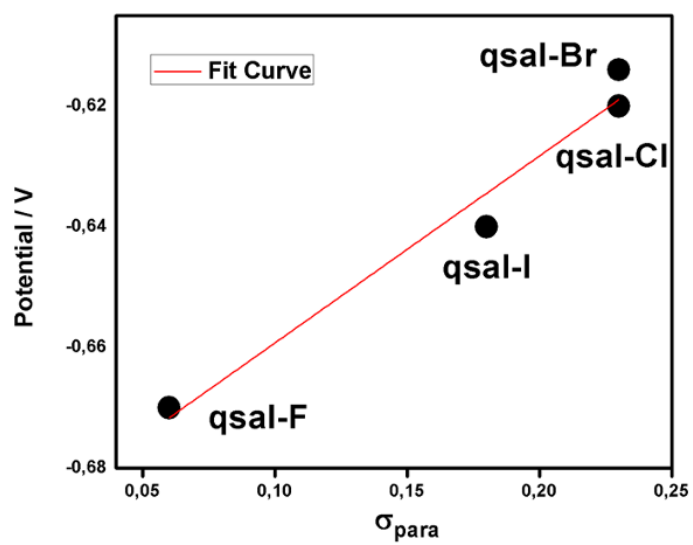

**Figure S11** Plot of  $E^{\circ}$ (V) vs  $\sigma_p$  for **1-4**.
